# Supplementary material for: The influence of support composition on the activity of Cu:Ce catalysts for selective catalytic reduction of NO by CO in the presence of excess oxygen
Source: Royal Society of Chemistry journal article supplement (doi:10.1039/c9nj04335g), 2019-11-27
Supplement: c9nj04335g1.pdf [file c9nj04335g1.pdf]

## Supplementary materials

### **The Influence of Support Composition on the Activity of Cu:Ce Catalysts for Selective Catalytic Reduction of NO by CO in the Presence of Excess Oxygen**

Zahra Gholami<sup>1,2\*</sup>, Guohua Luo<sup>2</sup>, Fatemeh Gholami<sup>3</sup>

<sup>1</sup>Unipetrol Centre of Research and Education, a.s, Areál Chempark 2838, Záluží 1, 436 70 Litvínov, Czech Republic

<sup>2</sup>Beijing Key Laboratory of Green Chemical Reaction Engineering and Technology, Department of Chemical Engineering, Tsinghua University, Beijing 100084, China

<sup>3</sup>New Technologies - Research Centre, University of West Bohemia, Engineering of Special Materials, Plzeň 301 00, Czech Republic

\*Corresponding author

Tel: +420 471 122 239, E-mail: Zahra.Gholami@unicre.cz

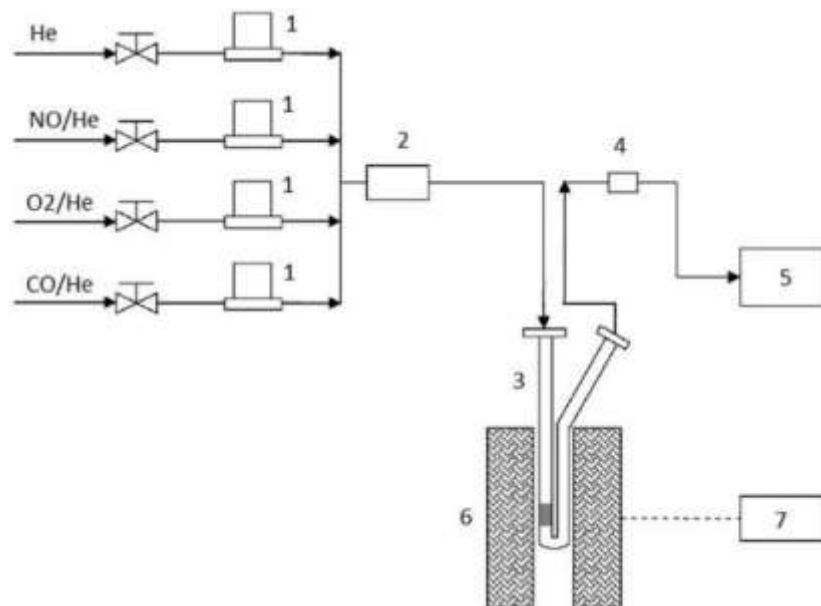

Fig. S1. Schematic of the fixed bed reactor for selective catalytic reduction of NO with CO. 1) mass flow controller; 2) mixing chamber; 3) fixed bed; 4) filter; 5) chemiluminescence analyzer; 6) furnace; 7) temperature controller.

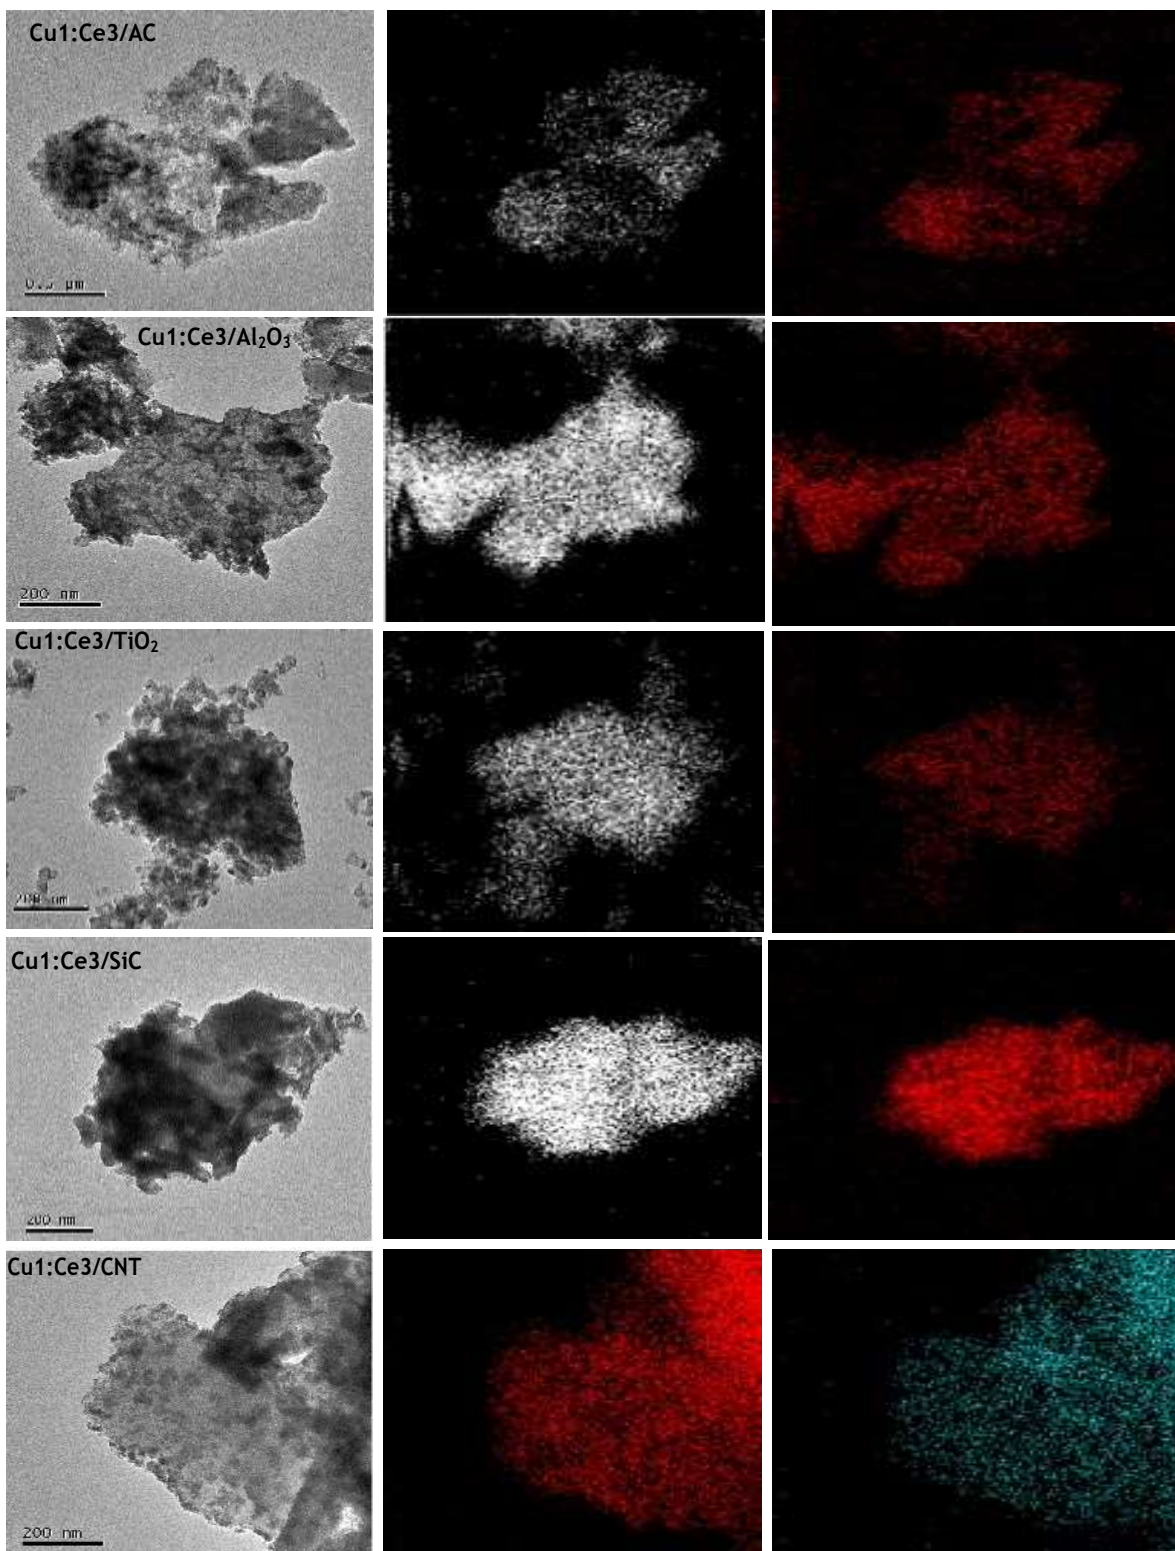

Fig. S2. Elemental Mapping of Cu<sub>1</sub>:Ce<sub>3</sub> catalysts supported on different solid carriers.

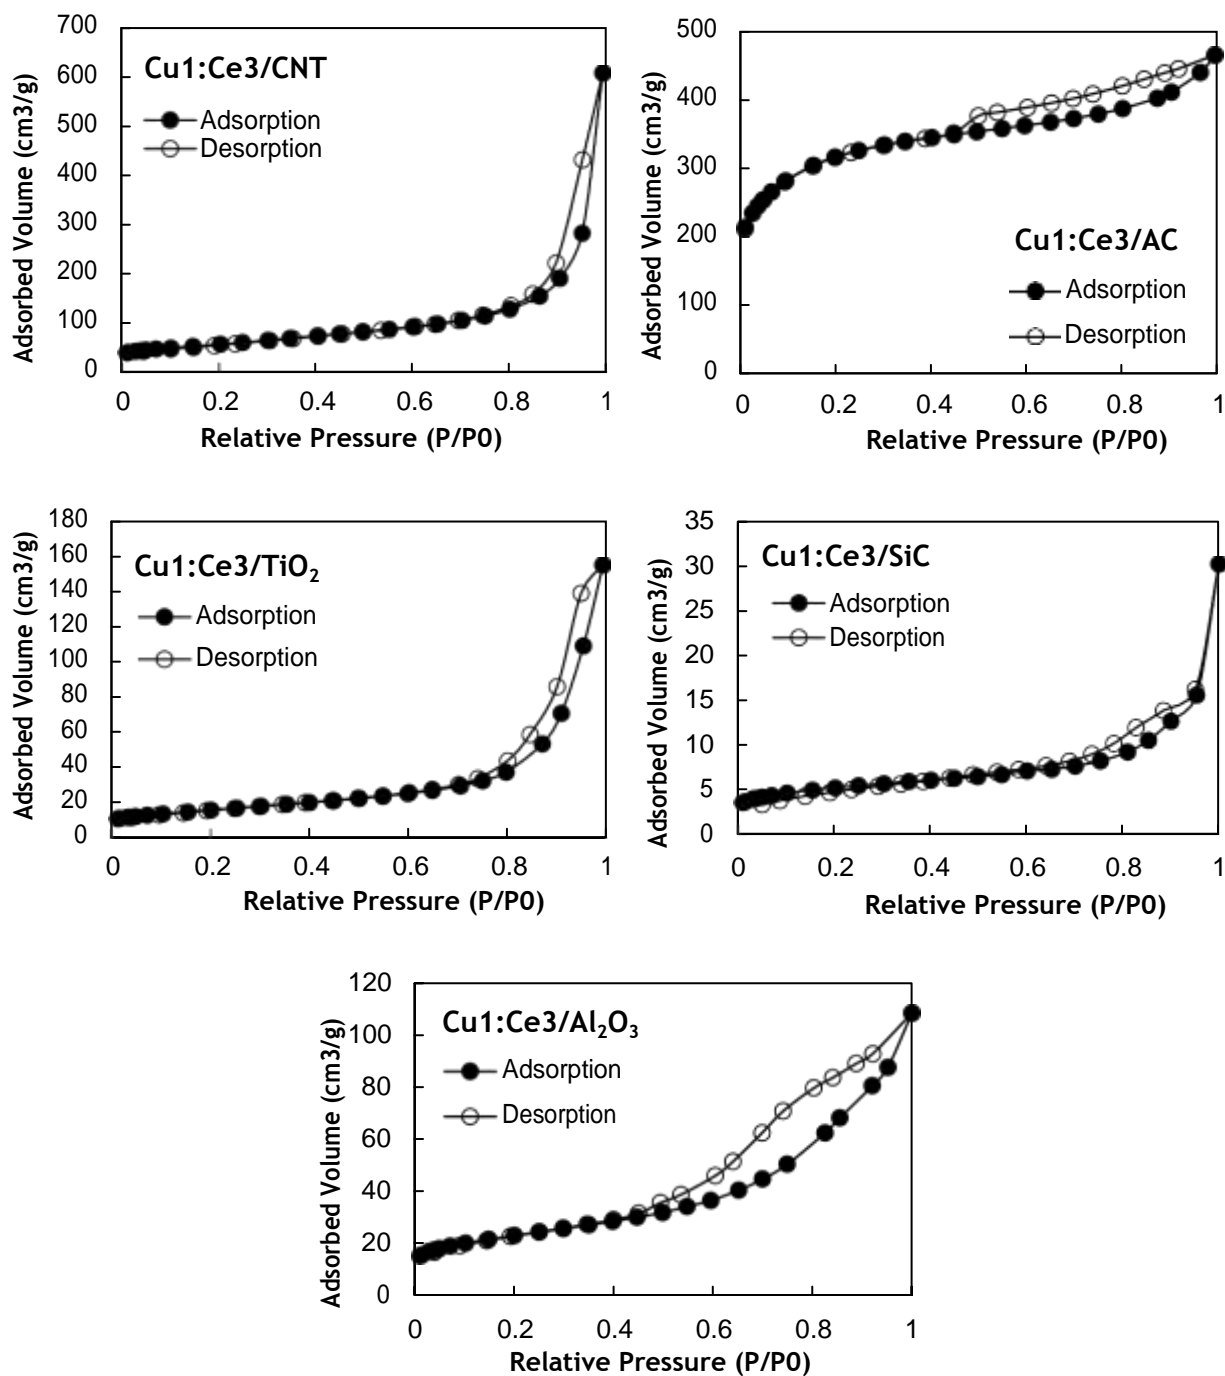

Fig. S3. Adsorption-desorption isotherms of nitrogen for Cu<sub>1</sub>:Ce<sub>3</sub> catalyst supported on different solid carriers.
